# Supplementary material
Source: publisher figshare collection journal article supplement (https://karger.figshare.com/ndownloader/files/38287536)
Supplement: Supplementary file 1 [file 38287536]

**Supplementary data**

**Ultrathin bronchoscopy for the diagnosis of peripheral pulmonary lesions: a meta-analysis**

Soo Han Kim1,2, Jinmi Kim2,3, Kyoungjune Pak2,4,*, Jung Seop Eom1,2,*

1Department of Internal Medicine, Pusan National University School of Medicine, 179 Gudeok-ro, Seo-gu, 49241, Busan, Republic of Korea.

2Biomedical Research Institute, Pusan National University Hospital, 179 Gudeok-ro, Seo-gu, Busan, 49241, Republic of Korea.

3Department of Biostatistics, Pusan National University Hospital, 179 Gudeok-ro, Seo-gu, 49241, Busan, Republic of Korea.

4Department of Nuclear Medicine, Pusan National University Hospital, 179 Gudeok-ro, Seo-gu, Busan, 49241, Republic of Korea.

*Kyoungjune Pak and Jung Seop Eom contributed equally as corresponding authors.

Supplementary Table S1. Study quality assessment by QUADAS-2 tool

| Author/year | Risk of Bias | | | | Applicability | | |
| --- | --- | --- | --- | --- | --- | --- | --- |
| Patient Selection | Index test | Reference Standard | Flow and Timing | Patient Selection | Index Test | Reference Standard |
|
| Shinagawa 2004 [1] | low | low | high | unclear vs high | low | low | unclear |
| Yamamoto 2004 [2] | low | low | high | high | low | low | low |
| Shinagawa 2007 [3] | low | low | high | high | low | low | unclear |
| Tachihara 2007 [4] | low | low | high | high | low | low | low |
| Oki 2009 [5] | low | low | high | unclear vs high | low | low | low |
| Matsuno 2011 [6] | low | low | high | high | low | low | low |
| Oki 2012 [7] | low | low | high | high | low | low | low |
| Asano 2013 [8] | low | low | high | high | low | low | low |
| Oki 2015 [9] | low | low | high | high | low | low | low |
| Franzen 2016 [10] | low | low | high | high | low | low | low |
| Tokoro 2016 [11] | low | low | high | high | low | low | unclear |
| Ali 2019 [12] | low | low | high | high | low | low | high |
| Diez-Ferrer 2019 [13] | low | low | high | high | low | low | low |
| Oki 2019 [14] | low | low | high | high | low | low | low |
| Sehgal 2019 [15] | high | low | high | high | low | low | unclear |
| Sumi 2020 [16] | high | low | high | high | low | low | unclear |
| Kawakita 2021 [17] | low | low | high | high | low | low | high |
| Sumi 2021 [18] | low | low | high | high | low | low | unclear |
| Zheng 2021 [19] | low | low | high | high | low | low | low |

**Reference**

1 Shinagawa N, Yamazaki K, Onodera Y, Miyasaka K, Kikuchi E, Dosaka-Akita H, et al. CT-guided transbronchial biopsy using an ultrathin bronchoscope with virtual bronchoscopic navigation. Chest. 2004 Mar;125(3):1138-43.

2 Yamamoto S, Ueno K, Imamura F, Matsuoka H, Nagatomo I, Omiya Y, et al. Usefulness of ultrathin bronchoscopy in diagnosis of lung cancer. Lung Cancer. 2004;46(1):43-8.

3 Shinagawa N, Yamazaki K, Onodera Y, Asano F, Ishida T, Moriya H, et al. Virtual bronchoscopic navigation system shortens the examination time--feasibility study of virtual bronchoscopic navigation system. Lung Cancer. 2007 May;56(2):201-6.

4 Tachihara M, Ishida T, Kanazawa K, Sugawara A, Watanabe K, Uekita K, et al. A virtual bronchoscopic navigation system under X-ray fluoroscopy for transbronchial diagnosis of small peripheral pulmonary lesions. Lung Cancer. 2007 Sep;57(3):322-7.

5 Oki M, Saka H, Kitagawa C, Kogure Y, Mori K, Kajikawa S. Endobronchial ultrasound-guided transbronchial biopsy using novel thin bronchoscope for diagnosis of peripheral pulmonary lesions. Journal of thoracic oncology : official publication of the International Association for the Study of Lung Cancer. 2009 Oct;4(10):1274-7.

6 Matsuno Y, Asano F, Shindoh J, Abe T, Shiraki A, Ando M, et al. CT-guided ultrathin bronchoscopy: Bioptic approach and factors in predicting diagnosis. Internal Medicine. 2011;50(19):2143-8.

7 Oki M, Saka H, Kitagawa C, Kogure Y, Murata N, Adachi T, et al. Randomized study of endobronchial ultrasound-guided transbronchial biopsy: thin bronchoscopic method versus guide sheath method. Journal of thoracic oncology : official publication of the International Association for the Study of Lung Cancer. 2012 Mar;7(3):535-41.

8 Asano F, Shinagawa N, Ishida T, Shindoh J, Anzai M, Tsuzuku A, et al. Virtual bronchoscopic navigation combined with ultrathin bronchoscopy. A randomized clinical trial. Am J Respir Crit Care Med. 2013 Aug 1;188(3):327-33.

9 Oki M, Saka H, Ando M, Asano F, Kurimoto N, Morita K, et al. Ultrathin bronchoscopy with multimodal devices for peripheral pulmonary lesions: A randomized trial. American Journal of Respiratory and Critical Care Medicine. 2015;192(4):468-76.

10 Franzen D, Diacon AH, Freitag L, Schubert PT, Wright CA, Schuurmans MM. Ultrathin bronchoscopy for solitary pulmonary lesions in a region endemic for tuberculosis: a randomised pilot trial. BMC Pulm Med. 2016 Apr 27;16(1):62.

11 Tokoro Y, Yasuo M, Kobayashi T, Hama M, Ichiyama T, Horiuchi T, et al. Computed tomography-guided bronchoscopy in the diagnosis of small peripheral pulmonary lesions: A retrospective study of 240 examinations in a single academic center. Respir Investig. 2016 Sep;54(5):347-54.

12 Ali EAA, Takizawa H, Kawakita N, Sawada T, Tsuboi M, Toba H, et al. Transbronchial Biopsy Using an Ultrathin Bronchoscope Guided by Cone-Beam Computed Tomography and Virtual Bronchoscopic Navigation in the Diagnosis of Pulmonary Nodules. Respiration. 2019;98(4):321-8.

13 Diez-Ferrer M, Morales A, Tebé C, Cubero N, López-Lisbona R, Padrones S, et al. Ultrathin Bronchoscopy with and without Virtual Bronchoscopic Navigation: Influence of Segmentation on Diagnostic Yield. Respiration. 2019;97(3):252-8.

14 Oki M, Saka H, Asano F, Kitagawa C, Kogure Y, Tsuzuku A, et al. Use of an Ultrathin vs Thin Bronchoscope for Peripheral Pulmonary Lesions: A Randomized Trial. Chest. 2019 Nov;156(5):954-64.

15 Sehgal IS, Dhooria S, Bal A, Gupta N, Ram B, Aggarwal AN, et al. A retrospective study comparing the ultrathin versus conventional bronchoscope for performing radial endobronchial ultrasound in the evaluation of peripheral pulmonary lesions. Lung India : official organ of Indian Chest Society. 2019 Mar-Apr;36(2):102-7.

16 Sumi T, Ikeda T, Sawai T, Shijubou N, Kure K, Yamada Y, et al. Comparison of ultrathin bronchoscopy with conventional bronchoscopy for the diagnosis of peripheral lung lesions without virtual bronchial navigation. Respiratory Investigation. 2020;58(5):376-80.

17 Kawakita N, Takizawa H, Toba H, Sakamoto S, Miyamoto N, Matsumoto D, et al. Cone-beam computed tomography versus computed tomography-guided ultrathin bronchoscopic diagnosis for peripheral pulmonary lesions: A propensity score-matched analysis. Respirology. 2021 May;26(5):477-84.

18 Sumi T, Kamada K, Sawai T, Shijubou N, Yamada Y, Nakata H, et al. Sedation with fentanyl and midazolam without oropharyngeal anesthesia compared with sedation with pethidine and midazolam with oropharyngeal anesthesia in ultrathin bronchoscopy for peripheral lung lesions. Respiratory Investigation. 2021;59(2):228-34.

19 Zheng X, Xie F, Li Y, Chen J, Jiang Y, Sun J. Ultrathin bronchoscope combined with virtual bronchoscopic navigation and endobronchial ultrasound for the diagnosis of peripheral pulmonary lesions with or without fluoroscopy: A randomized trial. Thorac Cancer. 2021 May 6
